# Supplementary material
Source: publisher figshare collection journal article supplement (https://sage.figshare.com/ndownloader/files/23659064)
Supplement: Supplementary file 1 [file 23659064]

## Supplemental material A

Table A.1. Feature list for modeling

| Category                  |                              | Feature description            | Abbreviation    |
|---------------------------|------------------------------|--------------------------------|-----------------|
| Stable individual feature | Music experience             | Habit of music listening       | S_Exp_L         |
|                           |                              | Ability to play an instrument  | S_Exp_I         |
|                           | Musical emotional preference | Preference for sleepy music    | S_Emo_sleepy    |
|                           |                              | Preference for Alert music     | S_Emo_alert     |
|                           |                              | Preference for energetic music | S_Emo_energetic |
|                           |                              | Preference for happy music     | S_Emo_happy     |
|                           |                              | Preference for surprised music | S_Emo_surprised |
|                           |                              | Preference for satisfied music | S_Emo_satisfied |
|                           |                              | Preference for fearful music   | S_Emo_fearful   |
|                           |                              | Preference for relaxed music   | S_Emo_relaxed   |
|                           |                              | Preference for inactive music  | S_Emo_inactive  |
|                           |                              | Preference for calm music      | S_Emo_calm      |
|                           |                              | Preference for bored music     | S_Emo_bored     |
|                           |                              | Preference for vegetated music | S_Emo_vegetated |
|                           |                              | Preference for sad music       | S_Emo_sad       |
|                           |                              | Preference for hopeless music  | S_Emo_hopeless  |
|                           |                              | Preference for peppy music     | S_Emo_peppy     |
|                           |                              | Preference for angry music     | S_Emo_angry     |
|                           | Demographic property         | Sex                            | S_D_S           |
|                           |                              | Academic background            | S_D_A           |
|                           | Personality                  | Extraversion                   | S_P_E           |
|                           |                              | Agreeableness                  | S_P_A           |
|                           |                              | Conscientiousness              | S_P_C           |
|                           |                              | Neuroticism                    | S_P_N           |
|                           |                              | Openness                       | S_P_O           |
| Real-time feature         | Mechanism indices            | Brain stem reflex              | R_M_BSR         |
|                           |                              | Rhythmic entrainment           | R_M_RE          |

|                   |                     |                              |              |
|-------------------|---------------------|------------------------------|--------------|
|                   | Episodic memory     | R_M_EM                       |              |
|                   | Conditioning        | R_M_CD                       |              |
|                   | Visual imagery      | R_M_VI                       |              |
|                   | Contagion           | R_M_CT                       |              |
|                   | Musical expectancy  | R_M_ME                       |              |
|                   | Cognitive appraisal | R_M_CA                       |              |
|                   |                     |                              |              |
| Category          |                     | Feature description          | Abbreviation |
| Real-time feature | Preference          | Preference for target music  | R_P          |
|                   | Familiarity         | Familiarity for target music | R_F          |
|                   | Perceived emotions  | Perceived happy rating       | R_P_happy    |
|                   |                     | Perceived relaxed rating     | R_P_relaxed  |
|                   |                     | Perceived sad rating         | R_P_sad      |
|                   |                     | Perceived angry rating       | R_P_angry    |
|                   | Felt emotions       | Felt happy rating            | R_F_happy    |
|                   |                     | Felt relaxed rating          | R_F_relaxed  |
|                   |                     | Felt sad rating              | R_F_sad      |
|                   |                     | Felt angry rating            | R_F_angry    |
|                   |                     |                              |              |
| Audio features    | 1st audio feature   | A_1                          |              |
|                   | 2nd audio feature   | A_2                          |              |
|                   | 3rd audio feature   | A_3                          |              |
|                   | ...                 | ...                          |              |
|                   | 57th audio feature  | A_57                         |              |
|                   | 58th audio feature  | A_58                         |              |

## Supplemental material B

Table C.1. Results of correlation analysis of individual factors

|                 | Perceived emotion |         |         |         | Felt emotion |         |         |        |
|-----------------|-------------------|---------|---------|---------|--------------|---------|---------|--------|
|                 | Happy             | Relaxed | Sad     | Angry   | Happy        | Relaxed | Sad     | Angry  |
| R_P             | .246**            | .195**  | -.122** | -.039   | .491**       | .340**  | -.034   | -.024  |
| R_F             | .155**            | .049    | -.055   | .017    | .280**       | .136**  | .000    | .013   |
| R_M_CA          | .126**            | .035    | -.090** | .024    | .191**       | .057*   | -.049   | .064*  |
| R_M_ME          | -.094**           | -.067*  | .086**  | -.033   | -.120**      | -.083** | .058*   | .009   |
| R_M_CT          | .090**            | .070*   | .013    | .027    | .230**       | .160**  | .102**  | .009   |
| R_M_VI          | .129**            | .085**  | .038    | -.019   | .219**       | .155**  | .093**  | -.006  |
| R_M_CD          | .110**            | .085**  | .057*   | .028    | .191**       | .165**  | .113**  | .040   |
| R_M_EM          | .141**            | .100**  | .025    | .045    | .227**       | .188**  | .081**  | .039   |
| R_M_RE          | .165**            | .096**  | -.066*  | .043    | .351**       | .192**  | -.021   | .008   |
| R_M_BSR         | .048              | -.067*  | .023    | .265**  | .008         | -.169** | .020    | .260** |
| S_P_E           | -.020             | .014    | -.057*  | -.038   | -.030        | -.057*  | -.044   | .037   |
| S_P_A           | -.010             | .038    | -.062*  | -.079** | .011         | -.011   | -.014   | -.020  |
| S_P_C           | .024              | .012    | .044    | .071*   | .020         | -.023   | .065*   | .068*  |
| S_P_N           | .030              | .035    | .059*   | .019    | -.008        | .017    | .095**  | -.006  |
| S_P_O           | .059*             | .009    | -.004   | .007    | .052         | .031    | .038    | .041   |
| S_Exp_L         | -.025             | -.052   | -.055   | -.068*  | -.028        | -.067*  | -.002   | -.051  |
| S_Exp_I         | -.045             | .041    | .005    | -.012   | -.028        | .005    | -.003   | .019   |
| S_Emo_sleepy    | -.029             | .023    | -.003   | .038    | .037         | .025    | -.029   | .026   |
| S_Emo_alert     | -.082**           | -.058*  | .025    | .023    | -.079**      | -.024   | .042    | .001   |
| S_Emo_energetic | .035              | .032    | -.019   | .098**  | .080**       | .032    | .018    | .078** |
| S_Emo_happy     | .026              | .008    | -.090** | .002    | .028         | -.005   | -.094** | -.030  |
| S_Emo_surprised | .020              | -.033   | .059*   | .112**  | .053         | .067*   | .049    | .070*  |
| S_Emo_satisfied | .035              | .002    | -.019   | -.071*  | .075**       | .090**  | -.103** | -.069* |
| S_Emo_fearful   | .080**            | .066*   | -.033   | .018    | .081**       | .108**  | .033    | .055   |

|                 |        |         |       |         |        |         |        |         |
|-----------------|--------|---------|-------|---------|--------|---------|--------|---------|
| S_Emo_relaxed   | .016   | .022    | -.017 | .027    | .044   | .055    | -.058* | .011    |
| S_Emo_inactive  | .014   | .013    | .060* | .120**  | .082** | .062*   | .084** | .083**  |
| S_Emo_calm      | .026   | .072*   | .042  | .025    | .083** | .119**  | .030   | .082**  |
| S_Emo_bored     | -.040  | .035    | .012  | .027    | -.002  | .051    | .044   | .055    |
| S_Emo_vegetated | .061*  | .017    | .043  | .132**  | .092** | .041    | .088** | .196**  |
| S_Emo_sad       | -.003  | -.110** | .065* | .084**  | -.031  | -.075** | .084** | .023    |
| S_Emo_hopeless  | .008   | -.009   | .068* | .081**  | .025   | .024    | .097** | .032    |
| S_Emo_peppy     | .081** | .042    | -.020 | .066*   | .105** | .064*   | .044   | .110**  |
| S_Emo_angry     | .060*  | .001    | .073* | .160**  | .033   | .008    | .130** | .159**  |
| S_D_S           | -.063* | .004    | -.013 | -.173** | -.060* | .006    | .014   | -.183** |
| S_D_A           | .026   | .044    | .030  | .104**  | .084** | .076**  | -.026  | .052    |

\*\* . Correlation is significant at the 0.01 level (two-tailed).

\* . Correlation is significant at the 0.05 level (two-tailed).
